# Supplementary material
Source: PubMed Central journal article supplement (PMC6896997)
Supplement: NIHMS1057608-supplement-1.pdf [file NIHMS1057608-supplement-1.pdf]

|               | <b>BORG</b> | <b>Pulse</b> | <b>RESP</b> | <b>SaO2</b> | <b>Temp</b> |
|---------------|-------------|--------------|-------------|-------------|-------------|
| (r, p-value)  |             |              |             |             |             |
| Excur_AngPosX | 0.13        | 0.19         | 0.14        | -0.15       | 0.19        |
|               | 0.23        | 0.07         | 0.19        | 0.16        | 0.07        |
| Excur_AngPosY | 0.2         | 0.18         | 0.24        | -0.2        | 0.26        |
|               | 0.06        | 0.09         | 0.02        | 0.06        | 0.01        |
| Excur_AngPosZ | 0.16        | 0.15         | 0.23        | -0.22       | 0.3         |
|               | 0.13        | 0.16         | 0.03        | 0.03        | 0.004       |
| Angular CSP   | 0.16        | 0.16         | 0.2         | -0.24       | 0.23        |
|               | 0.13        | 0.14         | 0.06        | 0.02        | 0.03        |
| RMS_AngVelY   | 0.27        | 0.18         | 0.22        | -0.16       | 0.23        |
|               | 0.01        | 0.08         | 0.04        | 0.13        | 0.03        |

**Supplementary Table 1:** Correlation Matrix between physiological and psychological responses.
